# Supplementary material for: Insulin Reverses the High-Fat Diet–Induced Increase in Brain Aβ and Improves Memory in an Animal Model of Alzheimer Disease
Source: Oxford University Press journal article supplement (doi:10.2337/db14-0375), 2014-07-10
Supplement: db140375supplementarydata.pdf [file db140375supplementarydata.pdf]

SUPPLEMENTARY DATA

**Supplementary Figure 1.** Effect of high-fat diet on peripheral metabolism and behavior of 3xTg-AD and NonTg mice. A) Reduced insulin sensitivity of 15-month-old mice following high fat diet ingestion. 1) Gastocnemius and 2) liver pAKT (pSer473) concentration measured by western blot 5 min. after I.V. insulin injection (3.8 U/kg). B) High fat diet increased plasmatic triglycerides 3xTg-AD mice. Triglycerides were measured in plasma sample of 15-month-old mice fed the control or the high fat diet for 9 months. C) High Fat Diet reduced locomotor activity in NonTg mice and 3xTg-AD mice had lower locomotor activity and higher anxiety-like behavior than NonTg mice. 1) Voluntary horizontal movement was measured during a one-hour openfield session. 2) Anxiety-like behavior was evaluated using the dark-light emergence test.

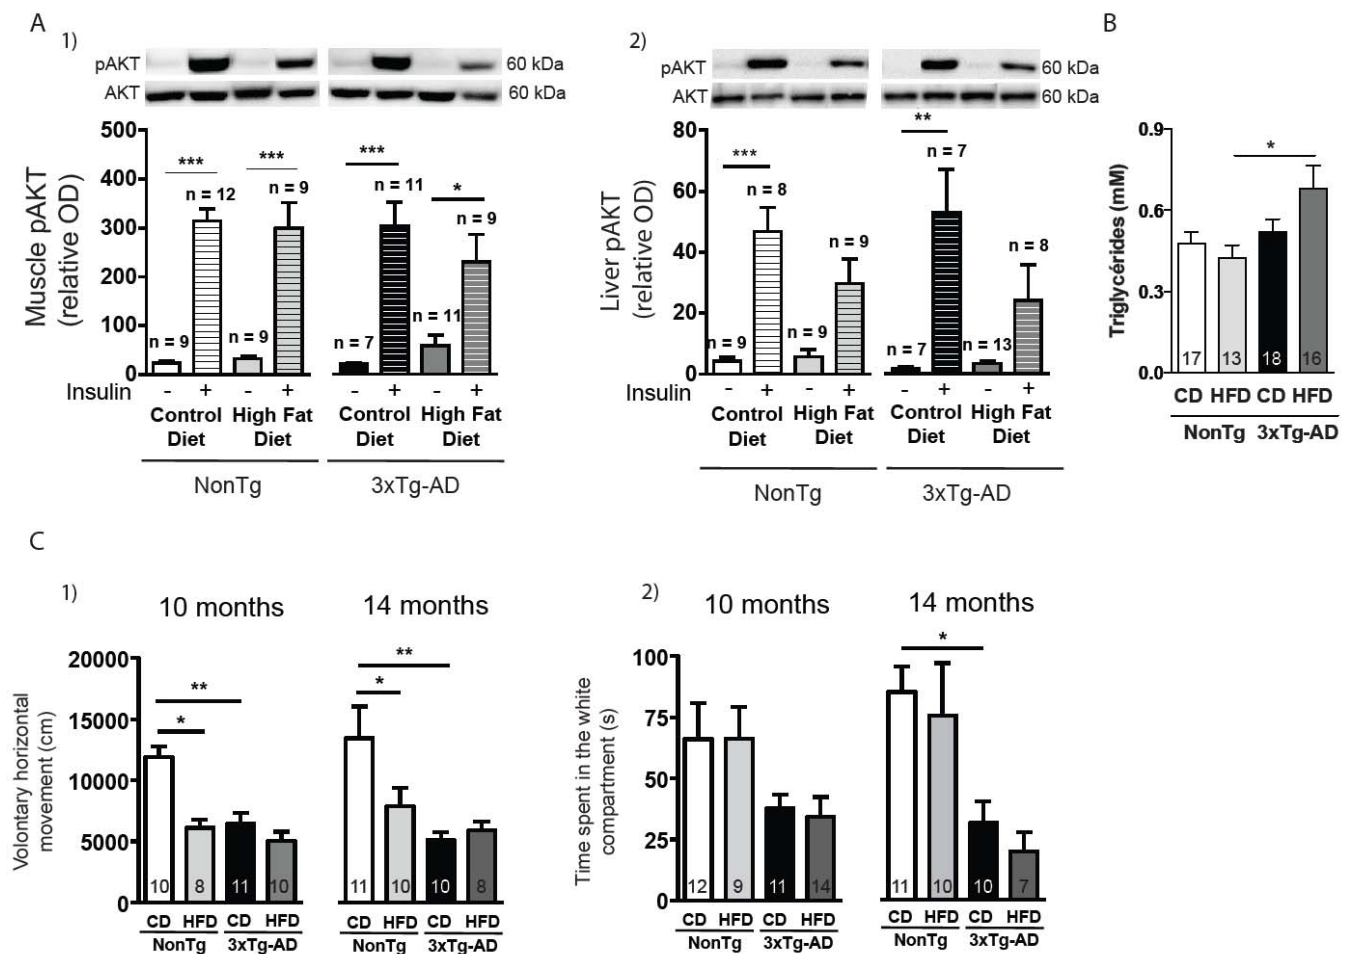

Data are presented as mean ± SEM.

Data are compared using one-way ANOVA and Tukey's post-hoc analysis.

\*p < 0.05, \*\*p < 0.01, \*\*\*p < 0.0001.

NonTg = Non-Transgenic mice, 3xTg-AD = triple-transgenic mice.

SUPPLEMENTARY DATA

**Supplementary Figure 2.** Effect of high-fat diet and insulin on tau and amyloid protein levels of 3xTg-AD mice A) High-fat diet increased tau phosphorylation but did not modulate amyloid pathology in 10-month-old 3xTg-AD mice. 1) Cortex soluble tau pathology was measured by Western blot and 2) amyloid pathology was measured by ELISA after 4 months of high-fat diet. B) Insulin reduces hippocampal soluble Aβ42 in the high-fat fed 3xTg-AD mice. 1) Hippocampus tau immunofluorescence of 15-month-old 3xTg-AD mice fed the high-fat diet for 9 months. 2) Hippocampus soluble tau pathology measured by Western blot and 3) amyloid pathology measured by ELISA, 5 min. after IV insulin injection (3.8 U/kg).

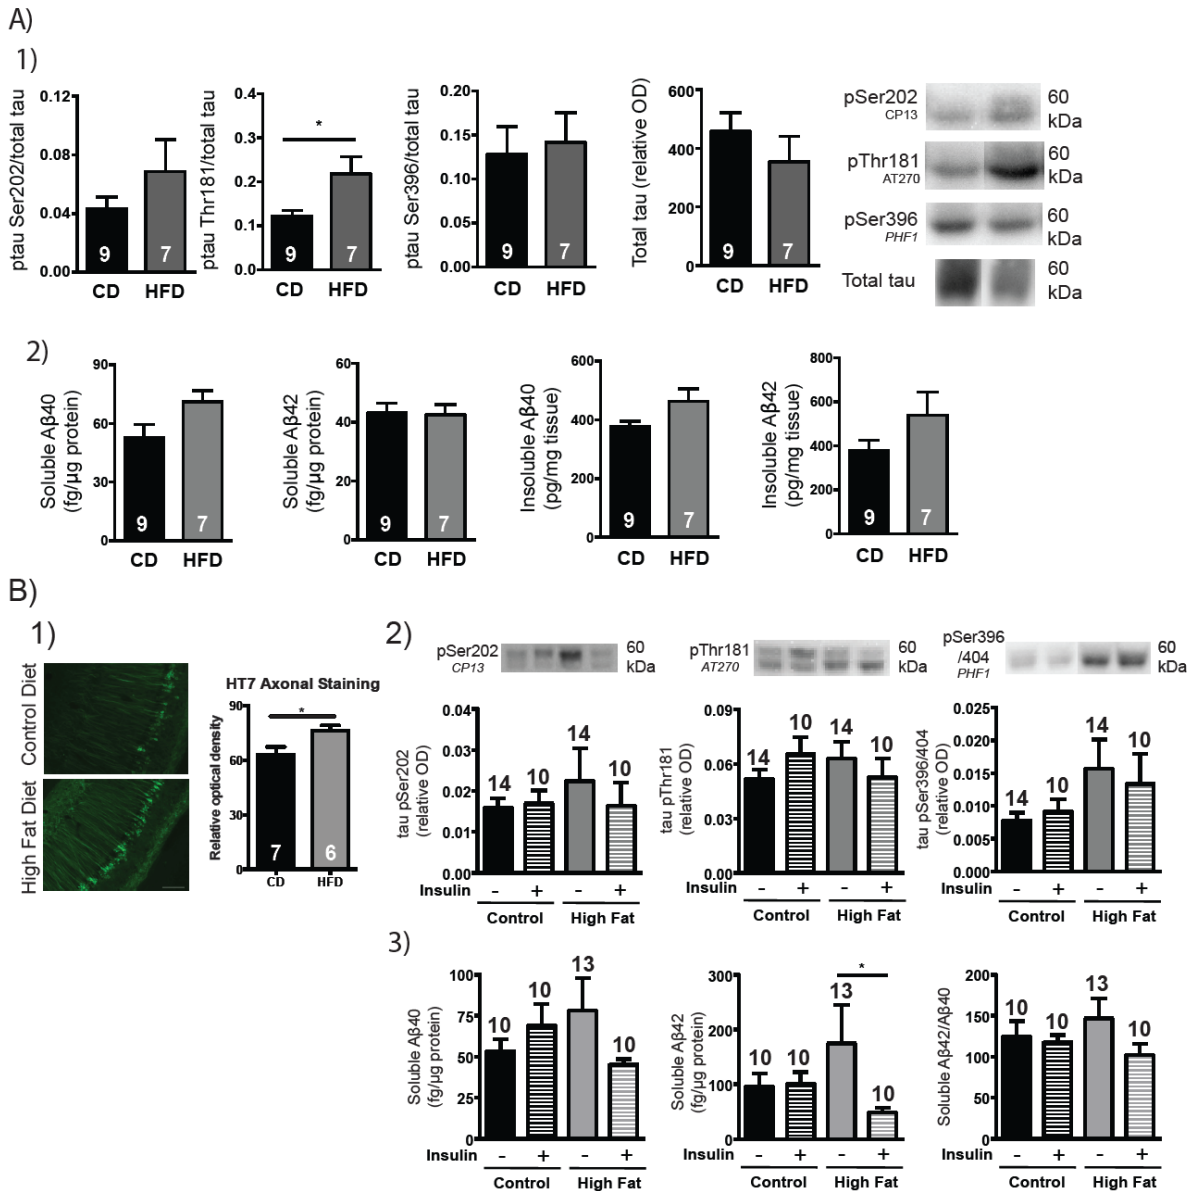

Data are presented as mean ± SEM.

Data for immunofluorescence and ELISA experiment are compared using Student t-test and other data are compared using one-way ANOVA and Tukey's post-hoc analysis.

Data are compared using Unpaired Student t-test.

\*p < 0.05.

CD = control diet; HFD = high-fat diet.

SUPPLEMENTARY DATA

**Supplementary Figure 3.** Insulin has limited impact on cortical tau and synaptic pathology. Parieto-temporal cortex tau pathology of 3xTg-AD mice fed the control (CD) or the high fat diet (HFD) for 9 months 5 minutes after single insulin (3.8 U/Kg) or saline injection. A) Soluble ptau, B) sarkosyl-insoluble tau pathology and C) kinases concentration. D) Synaptic proteins in 15-month-old mice cortex.

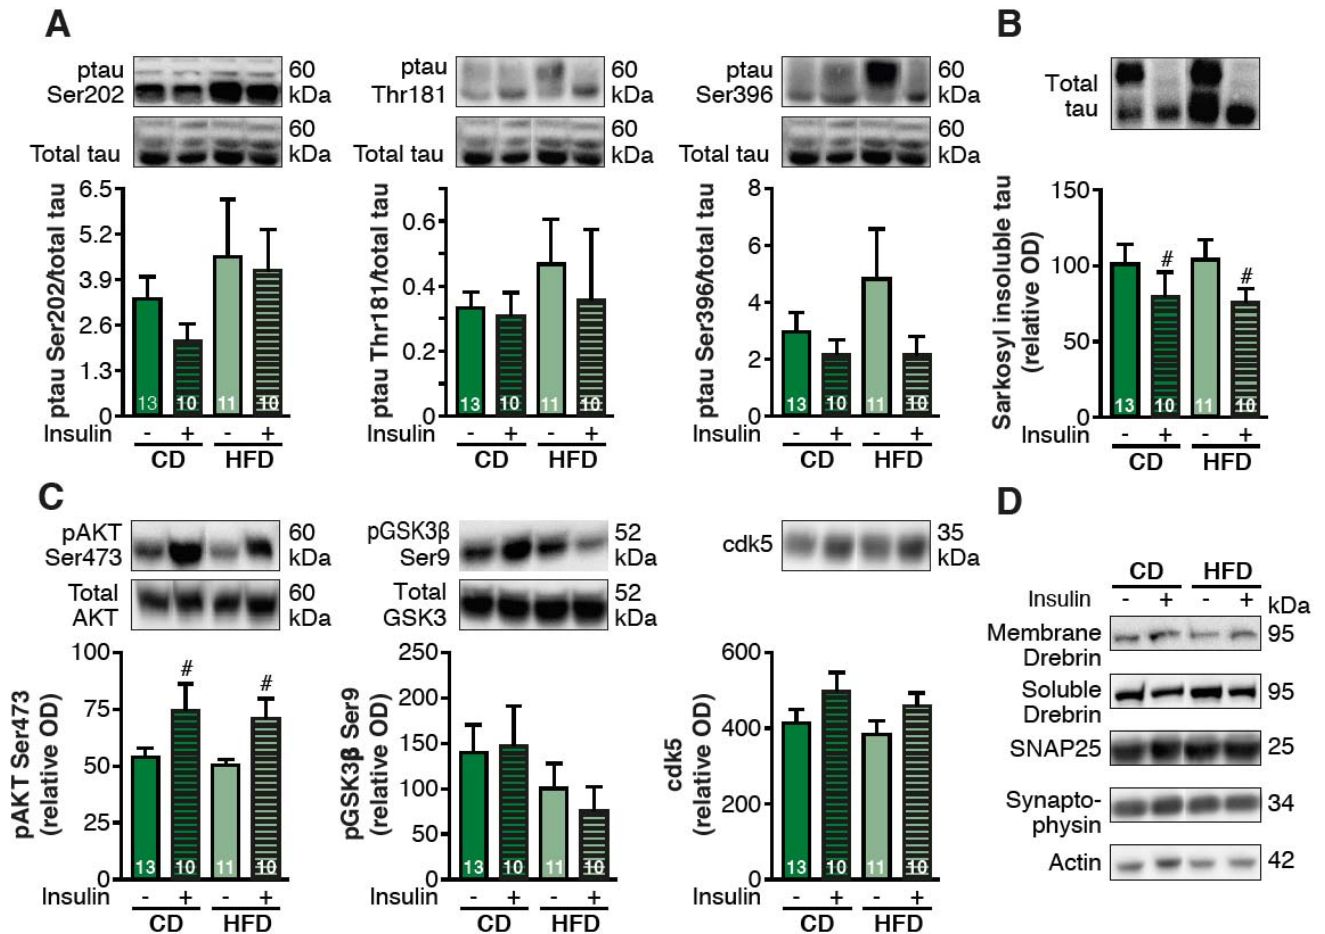

Data are presented as mean  $\pm$  SEM.  $n = 10$  to  $13$  for biochemical analysis. To compare all groups separately, data are compared using one-way ANOVA followed by a Tukey's post-hoc analysis when variances were equal variances. \* $p < 0.05$ .

A Dunnett's post-hoc analysis was performed to compare groups when variances were not equal.

\* $p < 0.05$ , \*\* $p < 0.01$ .

To verify the effect of insulin and dietary treatment a two-way ANOVA was performed. # $p < 0.05$ .

SUPPLEMENTARY DATA

**Supplementary Figure 4.** Insulin had no effect on cortical APP-CTF concentration of 15-month-old 3xTg-AD mice fed the high-fat diet. APP-CTF concentration was measured using an ELISA.

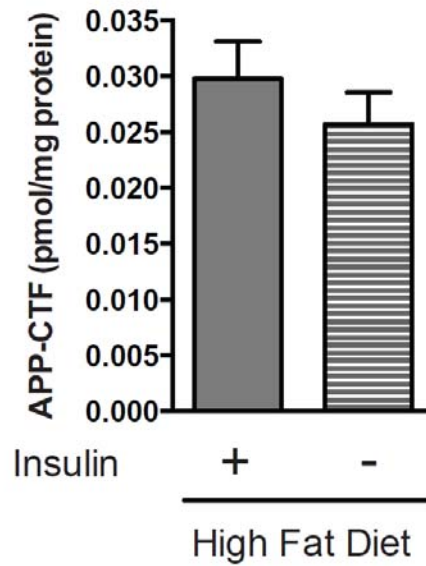

Data are presented as mean  $\pm$  SEM.  
Data are compared using Unpaired Student t-test.  
no difference was found between groups.

SUPPLEMENTARY DATA

**Supplementary Table 1.** Impact of high-fat diet ingestion and insulin injection on cortical synaptic proteins concentrations.

| Protein                 | Control Diet  |   |     |                |   |     | High Fat Diet   |   |     |                |   |     | p value |
|-------------------------|---------------|---|-----|----------------|---|-----|-----------------|---|-----|----------------|---|-----|---------|
|                         | Saline (n=13) |   |     | Insulin (n=10) |   |     | Saline (n = 11) |   |     | Insulin (n=10) |   |     |         |
|                         | Mean          | ± | SD  | Mean           | ± | SD  | Mean            | ± | SD  | Mean           | ± | SD  |         |
| <b>Soluble drebrin</b>  | 104           | ± | 41  | 100            | ± | 67  | 78              | ± | 25  | 92             | ± | 38  | ns      |
| <b>Membrane drebrin</b> | 12            | ± | 5   | 11             | ± | 6   | 11              | ± | 5   | 12             | ± | 6   | ns      |
| <b>Synaptophysin</b>    | 918           | ± | 244 | 864            | ± | 248 | 808             | ± | 258 | 982            | ± | 339 | ns      |
| <b>SNAP25</b>           | 653           | ± | 127 | 634            | ± | 110 | 701             | ± | 159 | 714            | ± | 192 | ns      |

To compare all groups separately, data were compared using one-way ANOVA followed by a Tukey's post-hoc analysis. No statistical difference was found between groups.

**Supplementary Table 2.** Effect of insulin injection and high-fat diet ingestion on cortical concentrations of A $\beta$  clearance related proteins.

| Protein             | Control Diet  |   |     |                |   |      | High Fat Diet   |   |      |                |   |     | p value |
|---------------------|---------------|---|-----|----------------|---|------|-----------------|---|------|----------------|---|-----|---------|
|                     | Saline (n=13) |   |     | Insulin (n=10) |   |      | Saline (n = 11) |   |      | Insulin (n=10) |   |     |         |
|                     | Mean          | ± | SD  | Mean           | ± | SD   | Mean            | ± | SD   | Mean           | ± | SD  |         |
| <b>Soluble IDE</b>  | 184           | ± | 49  | 190            | ± | 61   | 168             | ± | 33   | 169            | ± | 45  | ns      |
| <b>Membrane IDE</b> | 85            | ± | 63  | 112            | ± | 68   | 83              | ± | 61   | 110            | ± | 67  | ns      |
| <b>RAGE</b>         | 598           | ± | 148 | 613            | ± | 129  | 548             | ± | 155  | 603            | ± | 163 | ns      |
| <b>LRP1</b>         | 314           | ± | 79  | 309            | ± | 94,1 | 284             | ± | 72,3 | 296            | ± | 73  | ns      |

To compare all groups separately, data were compared using one-way ANOVA followed by a Tukey's post-hoc analysis. No statistical difference was found between groups.

SUPPLEMENTARY DATA

**Supplementary Table 3.** List of antibodies used for Western blot, immunofluorescence and immunohistochemistry.

| Antibody                      | Clone      | Specificity                                | Host   | Source                                              |
|-------------------------------|------------|--------------------------------------------|--------|-----------------------------------------------------|
| A $\beta$                     | 6C3        | monomeric A $\beta$ 40 and A $\beta$ 42    | Mouse  | EMD Millipore (Billerica, MA, USA)                  |
| ADAM10                        | polyclonal | c-term ADAM10, a.a. 732-748                | Rabbit | EMD Millipore (Billerica, MA, USA)                  |
| AKT                           | polyclonal | AKT a.a. 345-480                           | Rabbit | Santa Cruz Biotechnology Inc. (Santa Cruz, CA, USA) |
| AKT (phospho)                 | polyclonal | AKT, phosphorylated at Ser-473             | Rabbit | Cell Signaling Technology (Danvers, MA, USA)        |
| APP/A $\beta$                 | 6E10       | APP a.a. 1-16                              | Mouse  | Covance, Inc. (Princeton, NJ, USA)                  |
| BACE                          |            | Synthetic peptide                          | Mouse  | EMD Millipore (Billerica, MA, USA)                  |
| Beclin                        | polyclonal |                                            | Rabbit | Anaspec (Fremont, CA, USA)                          |
| Cleaved-Caspase 3 (Asp 175)   | polyclonal | Cleaved-Caspase 3 Asp 175                  | Rabbit | Cell Signaling Technology (Danvers, MA, USA)        |
| cdk5                          | polyclonal | c-term cdk5                                | Rabbit | Santa Cruz Biotechnology Inc. (Santa Cruz, CA, USA) |
| CO1                           | ID6        | Mitochondrial COX1                         | Mouse  | Santa Cruz Biotechnology Inc. (Santa Cruz, CA, USA) |
| Drebrin                       | Mx823      | c-term peptide (a.a.632-649)               | Mouse  | Progen Biotechnik GmbH (Heidelberg, Germany)        |
| GFAP                          | GA-5       | GFAP                                       | Mouse  | Sigma-Aldrich (St.Louis, MO, USA)                   |
| GSK3 $\beta$                  |            | Rat GSK-3 $\beta$ aa. 1-160                | Mouse  | BD Biosciences (Mississauga, ON, Canada)            |
| GSK3 $\beta$ (phospho)        | polyclonal | GSK3 $\beta$ , phosphorylated at Ser-9     | Rabbit | Cell Signaling Technology (Danvers, MA, USA)        |
| IDE                           | polyclonal | IDE, 93-273                                | Rabbit | Abcam (Toronto, ON, Canada)                         |
| Insulin                       | polyclonal | Insulin                                    | Rabbit | Cell Signaling Technology (Danvers, MA, USA)        |
| LC3                           | EP15284    | N-term, MAP1LC3A                           | Rabbit | Abcam (Toronto, ON, Canada)                         |
| LRP1                          | EPR3724    | Synthetic peptide                          | Rabbit | Abcam (Toronto, ON, Canada)                         |
| PSD95                         | K28/43     | PSD95                                      | Mouse  | Antibodies Incorporated (Davis, CA, USA)            |
| RAGE                          | 697023     | RAGE, gly 23 Leu 342                       | Rat    | R&D system (Minneapolis, MN, USA)                   |
| SNAP25                        | SM1 81     | Whole Snap25                               | Mouse  | Covance, Inc. (Princeton, NJ, USA)                  |
| Synaptophysin                 |            | Synaptophysin                              | Mouse  | EMD Millipore (Billerica, MA, USA)                  |
| Tau                           | polyclonal | c-term Tau                                 | Rabbit | Dako (Burlington, ON, Canada)                       |
| Tau (human)                   | Tau13      | Total human tau                            | Mouse  | Covance, Inc. (Princeton, NJ, USA)                  |
| Tau (paired helical filament) | HT7        | PHF Tau, a.a. 159-163                      | Mouse  | Pierce Endogen Inc. (Rockford, IL, USA)             |
| Tau (phospho)                 | CP13       | Tau, phosphorylated at Ser-205             | Mouse  | Generous gift from Peter Davies                     |
| Tau (phospho)                 | PHF1       | Tau, phosphorylated at Ser-396 and Ser-404 | Mouse  | Generous gift from Peter Davies                     |
| Tau (phospho)                 | AT 270     | Tau, phosphorylated at Thr-181             | Mouse  | Pierce Endogen Inc. (Rockford, IL, USA)             |
| X11 $\alpha$                  | polyclonal | X11, a.a. 1-220                            | Rabbit | Santa Cruz Biotechnology Inc. (Santa Cruz, CA, USA) |

## SUPPLEMENTARY DATA

### **Protein extraction**

The detailed procedure for protein extraction is described elsewhere (Lebbadi et al., 2011). Briefly, frozen parieto-temporal cortices were homogenized in tris-buffered saline (TBS) containing proteases and phosphatases inhibitors. Samples were centrifuged at 100,000 g for 20 minutes at 4°C to produce the soluble fraction : TBS-soluble intracellular and extracellular fraction. To produce the detergent-soluble fraction (membrane fraction), TBS-insoluble pellets were homogenized in RIPA buffer containing the same protease and phosphatase inhibitors. Part of the RIPA homogenate was used for sarkosyl extraction (see below) and the remaining homogenate was centrifuged at 100,000 g for 20 minutes at 4°C. The detergent-insoluble pellets were homogenized in 99% formic acid and centrifuged at 20,000 g for 20 minutes. The resulting supernatant was evaporated at room temperature for 48 to 72 hours. Part of the resulting pellet was resuspended in guanidine 50 mM for ELISA or Laemmli buffer for Western immunoblotting.

The isolation of the sarkosyl-insoluble fraction was based on a modified version (Julien et al., 2012) of the original protocol of Greenberg and Davies (Greenberg and Davies, 1990), 100 µl of the RIPA homogenate were centrifuged at 20,000 g for 20 minutes. Sarkosyl (1% v/v) was added to the supernatant, samples were put on rotating agitation at 37°C for 2 hours and were centrifuged for 1 hour at 100,000 g at 4°C. The supernatant was removed and the pellet was washed with 1% sarkosyl solution. Finally, the pellet was resuspended in Laemmli buffer for Western immunoblotting. Muscle and liver tissues were powderized and directly homogenized in RIPA buffer containing protease and phosphatase inhibitors. Homogenates were put on rotating agitation for 1 hour at 4°C and then centrifuged at 20,000 g for 20 minutes at 4°C. Laemmli buffer was added to the resulting supernatant and samples were denaturated at 95°C for 5 min for Western blot experiments.

### **APP-CTF quantification**

Cortex APP-CTF were measured using a human β-CTF ELISA (Affinity Diagnostics Corp., Toronto, ON, Canada) according to manufacturer instructions and plates were read at 450 nm using a Synergy™ HT multi-detection microplate reader (Biotek, Winooski, VT).

### **Histology**

Epididymal fat and pancreas were dissected, weighed and immediately post-fixed in paraformaldehyde 4% pH 7.4 for 48 hours. 10 µm sections were first hydrated in ethanol and stained in successive baths of hematoxylin (10 minutes), water (3 minutes) 70% alcohol and 1% HCl solution and washed with running water. Lithium carbonate dips, running water and eosin staining (30 seconds) were then performed prior to alcohol dehydration and coverslipping. Pancreatic islets area was measured under bright-field illumination using Stereo Investigator software (MicroBrightfield, Colchester, VT) integrated with an E800 Nikon microscope (Nikon Canada Inc., Mississauga, ON, Canada). Approximately 20 islets per animal were quantified with NeuroLucida modelling software (MicroBrightfield).

### **Evaluation of locomotor activity and anxiety-like behavior.**

Locomotor activity was evaluated using an open field system (San Diego Instruments, CA) consisting of 10 Plexiglas chambers (40 cm X 40 cm) during a one-hour session. Horizontal voluntary fine and ambulatory movements were detected using a Photobeam Activity System. Anxiety-like behaviour was evaluated using the dark-light emergence test (Latapy et al., 2012) performed in a box divided in two compartments (16 cm X 17 cm each): a dark one and a clear one with an opening between them (4 cm X 4 cm) to allow the mice to pass from one compartment to the other. The mice are placed in the center of the dark compartment. Time spent in each compartment was observed during a five minutes session.

## SUPPLEMENTARY DATA

### **Immunofluorescence**

For cerebral immunofluorescence experiments, 25- $\mu$ m-thick slices were used and stained with 6E10 antibody to label amyloid plaques. Plaque size were measured in the hippocampus at bregma -2.7 mm using the Stereo Investigator software (MicroBrightfield) integrated with an E800 Nikon microscope (Nikon Canada Inc.). For pancreatic immunofluorescence, paraffin-embedded 10- $\mu$ m pancreas sections from mice perfused with paraformaldehyde (4%, pH 7.4) were used. Detection of amyloid pathology of the pancreatic tissue was done using 6E10 and 6C3 antibodies. To be able to quantified number of 6E10 positive  $\beta$ -cells, a double staining was performed using an insulin antibody. Number of apoptotic  $\beta$ -cells in pancreatic islets was assessed with an antibody against cleaved caspase 3. Anti-mouse or anti-rabbit secondary antibodies conjugated with either Alexa Fluor 488 or 568 were used. Immunofluorescence was examined using an epifluorescence microscope (Olympus Provis AX70, Melville, NY) and photographs were taken using a Spot digital camera (Diagnostic Instruments, Sterling Heights, MI). All images were prepared for illustration in Adobe Photoshop 7.0.

### Reference

Greenberg, S.G., Davies, P., (1990). A preparation of Alzheimer paired helical filaments that displays distinct tau proteins by polyacrylamide gel electrophoresis. *PNAS* 87, 5827–5831

Julien, C., Bretteville, A., & Planel, E. (2012). Biochemical Isolation of Insoluble Tau in Transgenic Mouse Models of Tauopathies, *Methods Mol Biol.*, 849, 473–491.

Latapy, C., Rioux, V., Guitton, M.J., Beaulieu, J.-M., (2012). Selective deletion of forebrain glycogen synthase kinase 3 $\beta$  reveals a central role in serotonin-sensitive anxiety and social behaviour. *Philos Trans R Soc Lond B Biol Sci* 367, 2460–2474.

Sunyer, B., Patil, S., Höger, H., Lubec, G., (2007). Barnes maze, a useful task to assess spatial reference memory in the mice. *Nature Protocol*
